# Supplementary material for: Dry gel synthesis of hierarchical ZSM-5 zeolite using hydroxyl propyl methyl cellulose (HPMC) as a mesoporogen and its catalytic activity in alkylation reactions
Source: Royal Society of Chemistry journal article supplement (doi:10.1039/d2ra04325d), 2022-01-01
Supplement: d2ra04325d1.pdf [file d2ra04325d1.pdf]

## SUPPORTING INFORMATION

### **Dry gel synthesis of hierarchical ZSM-5 zeolite using hydroxyl propyl methyl cellulose (HPMC) as mesoporegen and its catalytic activity in alkylation reaction**

*Phan Huy Hoang\*, Nguyen Thi Thu Thao*

School of Chemical Engineering, Hanoi University of Science & Technology, No.1, Dai Co Viet Street, Hanoi, Vietnam

Corresponding author: [hoang.phanhuy@hust.edu.vn](mailto:hoang.phanhuy@hust.edu.vn)

Table S1. Benzyl alcohol conversion over Z-HEMC.30 catalyst at different reaction condition

| Dosage of catalyst,<br>wt% over benzyl alcohol | Reaction time,<br>h | Conversion of<br>Benzyl alcohol, % |
|------------------------------------------------|---------------------|------------------------------------|
| 30                                             | 2                   | 40.4±0.5                           |
| 30                                             | 4                   | 60.5±0.5                           |
| 30                                             | 8                   | 79.7±0.5                           |
| 40                                             | 2                   | 51.6±0.5                           |
| 40                                             | 4                   | 67.3±0.5                           |
| 40                                             | 8                   | 88.1±0.5                           |
| Reactions conducted at 80 °C                   |                     |                                    |

Table S2. Reuse of Z-HEMC.30 catalyst in benzylation

| Recycle number,<br>run                | Conversion of<br>Benzyl alcohol, % |
|---------------------------------------|------------------------------------|
| 1                                     | 73.8±0.5                           |
| 2                                     | 72.3±0.5                           |
| 3                                     | 70.7±0.5                           |
| 4                                     | 69.5±0.5                           |
| 5                                     | 68.4±0.5                           |
| Reactions conducted after 6h at 80 °C |                                    |
